# Supplementary material for: The effect of PEGylated hollow gold nanoparticles on stem cell migration: potential application in tissue regeneration
Source: Royal Society of Chemistry journal article supplement (doi:10.1039/c7nr01853c), 2017-01-01
Supplement: c7nr01853c1.pdf [file c7nr01853c1.pdf]

# **The effect of PEGylated Hollow Gold Nanoparticles on Stem Cell Migration. Potential Application in Tissue Regeneration**

*M. Mar Encabo-Berzosa<sup>a, b</sup>, Maria Sancho-Albero<sup>a, b</sup>, Alejandra Crespo<sup>c</sup>, Vanesa Andreu<sup>a, b</sup>, Victor Sebastian<sup>a, b</sup>, Silvia Irusta<sup>a, b</sup>, Manuel Arruebo<sup>a, b</sup>, Pilar Martín Duque<sup>c</sup>, Jesus Santamaria<sup>a, b</sup>*

<sup>a</sup>Department of Chemical Engineering. Aragon Institute of Nanoscience (INA), University of Zaragoza, Campus Río Ebro-Edificio I+D, C/ Poeta Mariano Esquillor S/N, 50018-Zaragoza, Spain.

<sup>b</sup>Networking Research Center on Bioengineering, Biomaterials and Nanomedicine, CIBER-BBN, 28029-Madrid, Spain.

<sup>c</sup>Universidad Francisco de Vitoria, Facultad de Ciencias Biosanitarias, Carretera Pozuelo a Majadahonda, Km 1.800, 28223 Pozuelo de Alarcón, Madrid, Spain

\*Corresponding author: [arruebom@unizar.es](mailto:arruebom@unizar.es)

## Supporting information

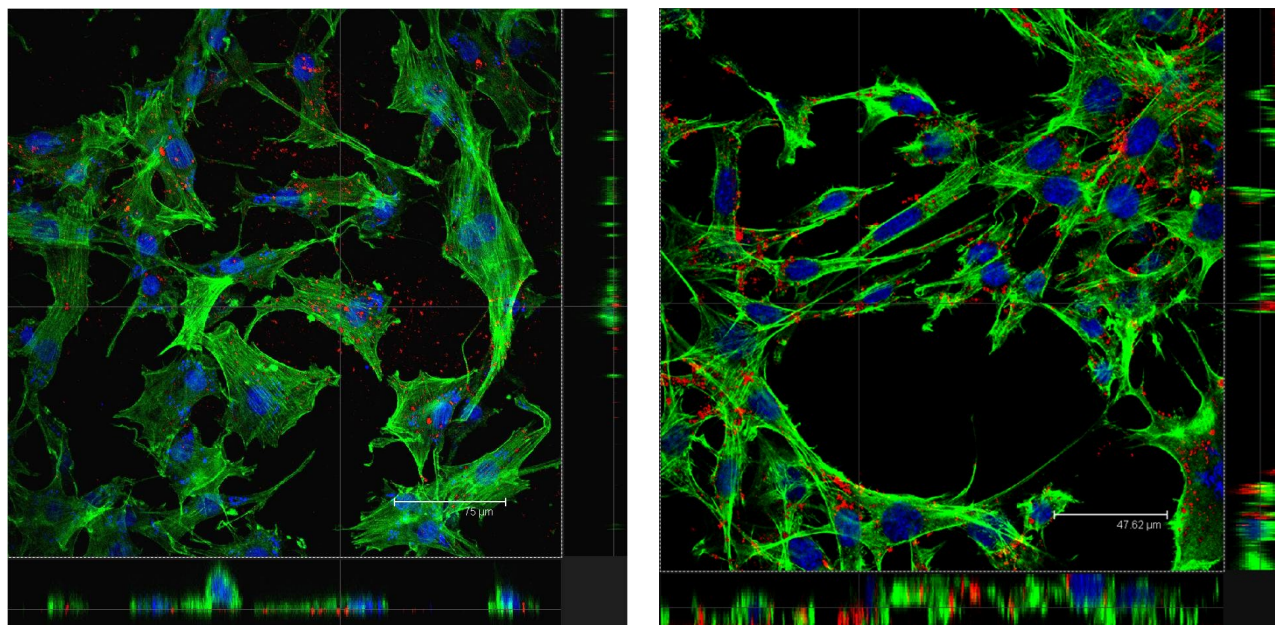

**Figure S1.** Intracellular location of HGNPs inside MSCs corroborated by confocal laser scanning microscopy. Orthogonal projections demonstrate the intracellular localization of the nanoparticles. Red: nanoparticles, green: actin fibers, blue: nuclei.

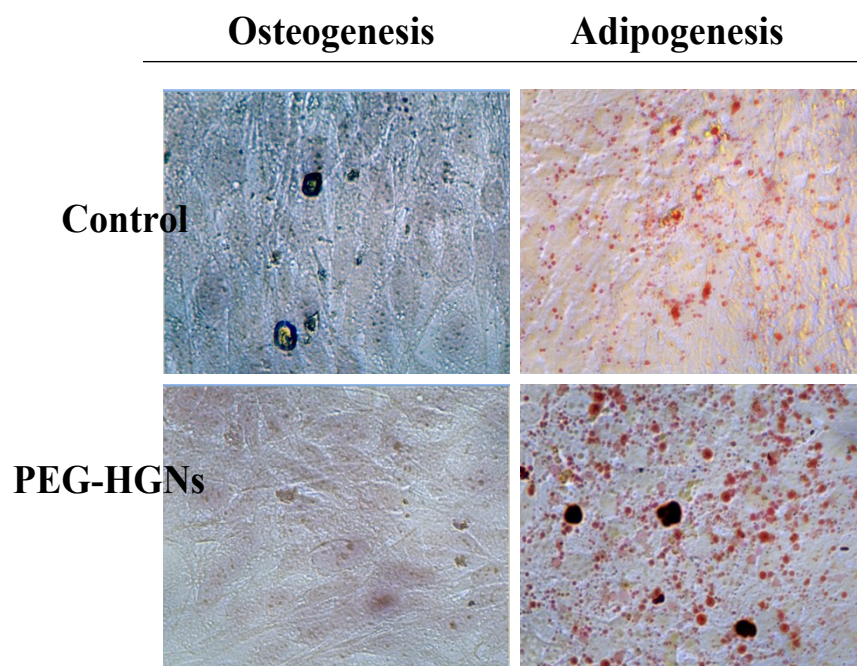

**Figure S2.** Specific differentiation staining of differentiated MSCs incubated with or without PEG-HGNs.

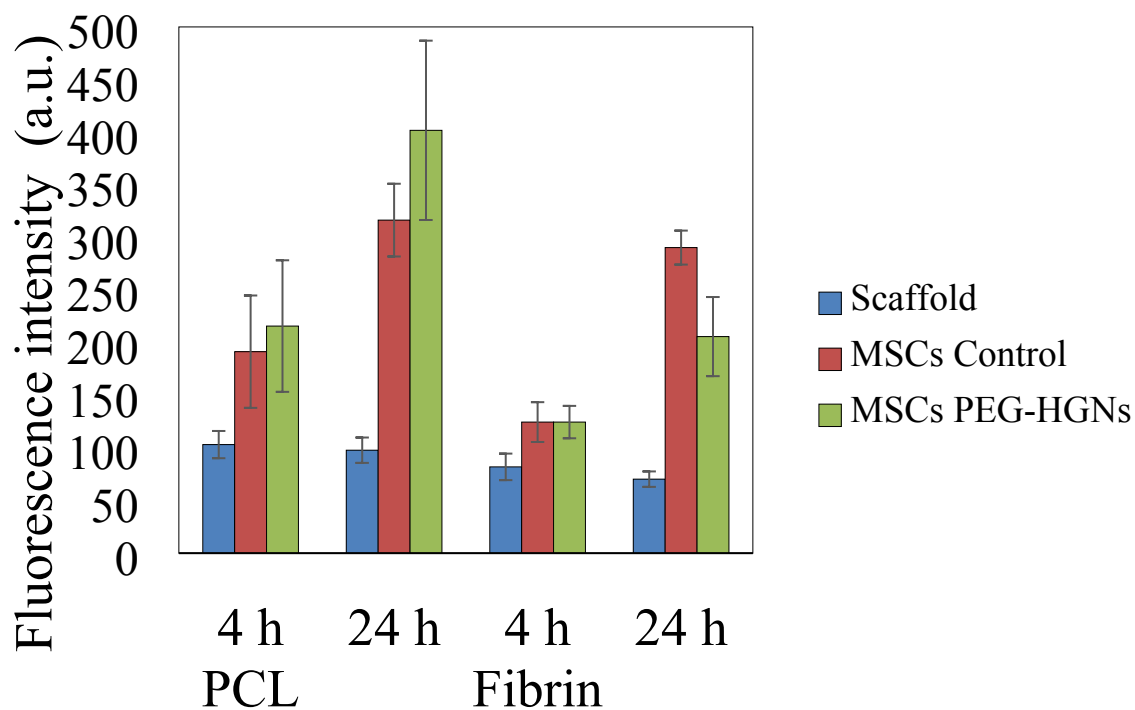

**Figure S3.** Cell proliferation on different scaffolds during 24 h. An AlamarBlue® assay was performed in order to evaluate the capacity of the cells to proliferate inside the scaffold.
